# Supplementary material
Source: PubMed Central journal article supplement (PMC2793352)
Supplement: mmc1.pdf [file mmc1.pdf]

Biophysical Journal, Volume 97

**Supporting Material**

**Nucleosome Assembly Depends on the Torsion in the DNA Molecule: a Magnetic Tweezers Study**

Pooja Gupta, Jordanka Zlatanova, and Miroslav Tomschik

## **SUPPLEMENTARY FIGURE LEGENDS**

FIGURE S1 Portions of assembly curves on topologically constrained 208-18 containing construct (8 kb in length). Assembly conditions and data analysis were as described in the Materials and Methods. Red curve represents 50 pt FFT smoothing.

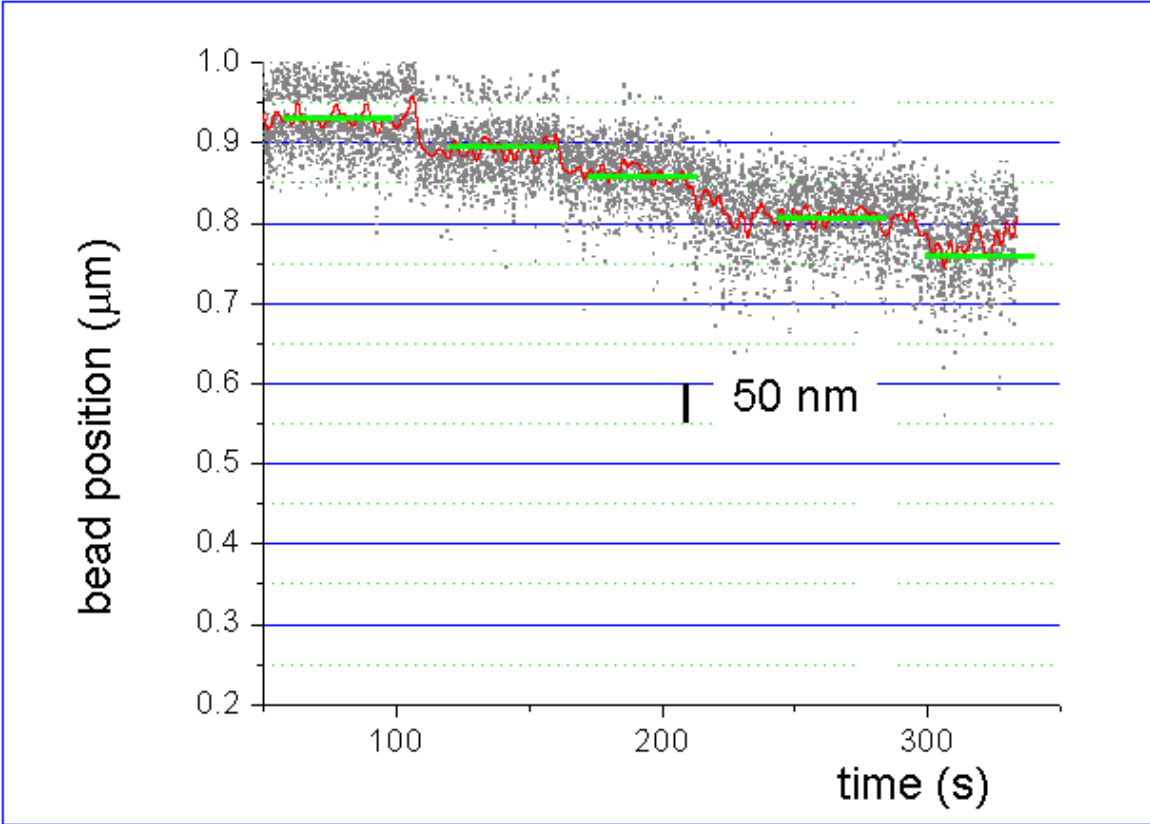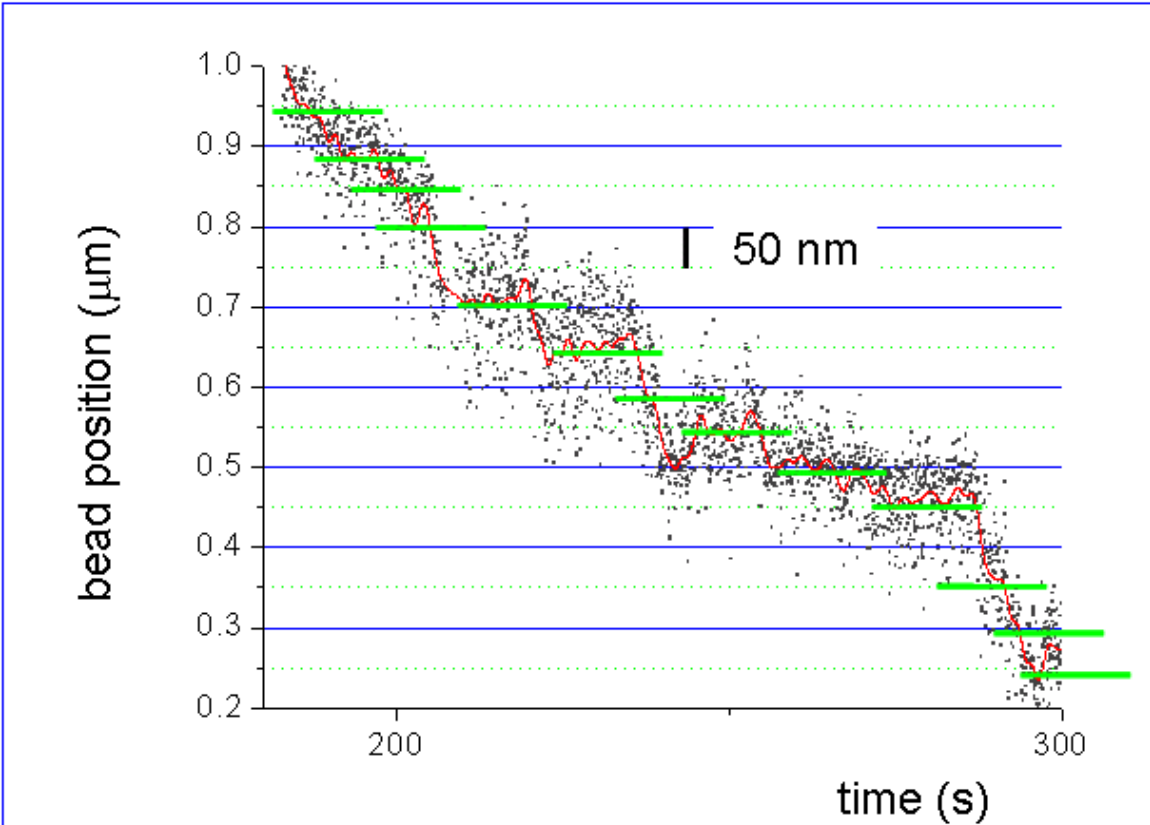

Supplementary Figure 1
